# Supplementary material
Source: MDPI journal article supplement (https://www.mdpi.com/2073-445X/12/3/706)
Supplement: s1 [file s1]

## Supplementary material

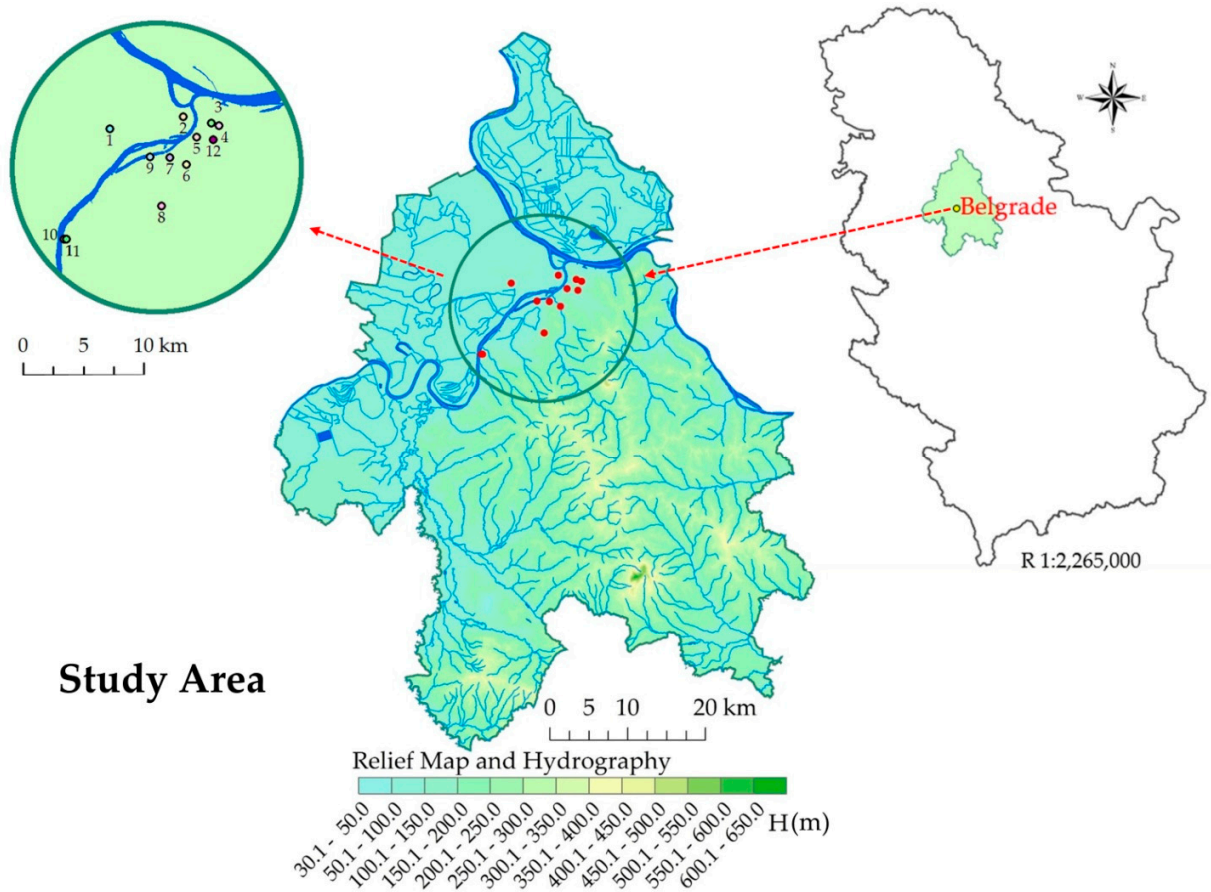

**Figure S1.** Location of the study area.

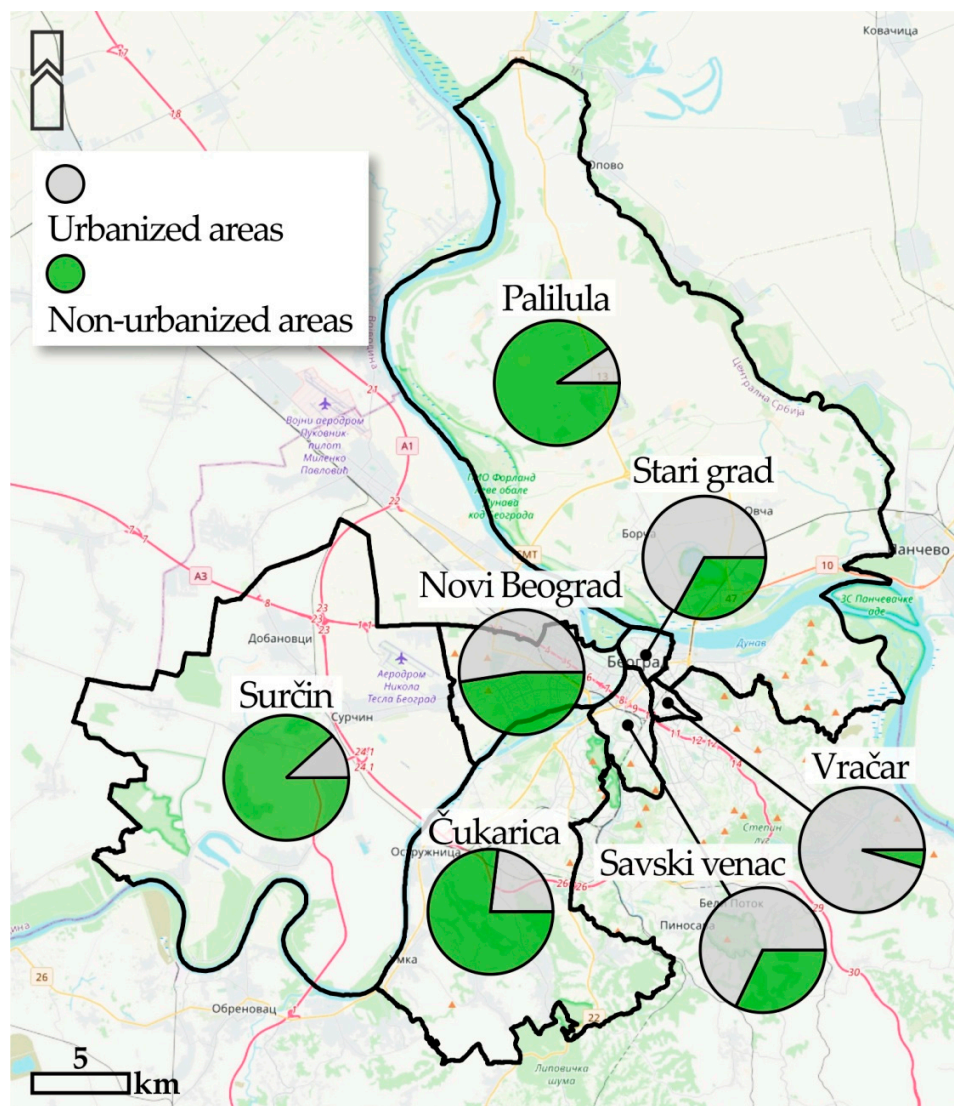

Figure S1a. The degree of urbanization by municipalities

Table S1. Description of the study areas.

| Location | Latitude $\phi$   | Longitude $\lambda$ | Altitude<br>H (m) | Soil type<br>WRB*                   | Aspect | Origin  |
|----------|-------------------|---------------------|-------------------|-------------------------------------|--------|---------|
| 1.       | 44° 48' 20.20 " N | 20° 21' 31.44" E    | 101               | Luvic Chernozems                    | -      | Planted |
| 2.       | 44° 48' 54.34" N  | 20° 26' 07.57" E    | 72                | Haplic Fluvisol<br>(Eutric, Siltic) | -      | Planted |
| 3.       | 44° 48' 37.59" N  | 20° 27' 52.93" E    | 118               | Haplic Cambisol (Eutric)            | -      | Planted |
| 4.       | 44° 48' 30.10" N  | 20° 28' 22.65" E    | 120               | Haplic Cambisol (Eutric)            | -      | Planted |
| 5.       | 44° 47' 58.87" N  | 20° 26' 58.43" E    | 74                | Haplic Fluvisol<br>(Eutric, Siltic) | W      | Planted |



|                                                                  |       |       |       |       |       |       |       |       |       |       |       |      |          |
|------------------------------------------------------------------|-------|-------|-------|-------|-------|-------|-------|-------|-------|-------|-------|------|----------|
| $\bar{x}$ 2022                                                   | 76.1  | 67.8  | 55.2  | 62.0  | 52.1  | 55.3  | 50.5  | 62.9  | 74.7  | 72.5  | 84.7  | 74.8 | 65.7     |
| $\bar{x}$ 91/2020                                                | 78.4  | 72.0  | 63.5  | 60.5  | 62.3  | 62.8  | 60.2  | 59.9  | 66.2  | 71.8  | 75.7  | 79.9 | 67.8     |
| $\bar{x}$ 81/2010                                                | 77.9  | 71.2  | 63.3  | 60.8  | 60.9  | 63.3  | 61.0  | 61.4  | 67.3  | 71.2  | 75.4  | 79.0 | 67.7     |
| $\bar{x}$ 71/2000                                                | 77.8  | 71.4  | 63.4  | 61.7  | 62.4  | 64.1  | 62.6  | 63.1  | 68.7  | 71.6  | 76.8  | 78.8 | 68.5     |
| $\bar{x}$ 61/1990                                                | 78.3  | 73.4  | 65.2  | 61.5  | 63.4  | 65.3  | 63.0  | 64.2  | 68.2  | 70.3  | 76.3  | 79.9 | 69.1     |
| Sums and mean precipitation sums (mm)                            |       |       |       |       |       |       |       |       |       |       |       |      |          |
| Period                                                           | 1     | 2     | 3     | 4     | 5     | 6     | 7     | 8     | 9     | 10    | 11    | 12   | $\Sigma$ |
| 2022                                                             | 45.7  | 22.2  | 10.5  | 80.1  | 32.2  | 43.3  | 63.9  | 89.7  | 98.0  | 13.1  | 64.9  | 76.1 | 639.7    |
| $\bar{x}$ 91/2020                                                | 47.9  | 43.5  | 48.7  | 51.5  | 72.3  | 95.6  | 66.6  | 55.1  | 58.6  | 54.8  | 49.6  | 54.8 | 698.8    |
| $\bar{x}$ 81/2010                                                | 46.9  | 40.0  | 49.3  | 56.1  | 58.0  | 101.2 | 63.0  | 58.3  | 55.3  | 50.2  | 55.1  | 57.4 | 691.0    |
| $\bar{x}$ 71/2000                                                | 44.0  | 38.4  | 45.4  | 60.1  | 67.5  | 95.4  | 68.9  | 57.1  | 55.0  | 50.5  | 54.0  | 51.8 | 688.1    |
| $\bar{x}$ 61/1990                                                | 49.4  | 44.4  | 49.5  | 58.8  | 70.7  | 90.4  | 66.5  | 51.2  | 51.4  | 40.3  | 54.3  | 57.5 | 684.4    |
| Sums and mean of sunshine duration (h)                           |       |       |       |       |       |       |       |       |       |       |       |      |          |
| 2022                                                             | 123.2 | 133.0 | 217.3 | 213.7 | 290.4 | 324.3 | 339.3 | 257.0 | 172.6 | 205.4 | 73.8  | 88.2 | 2438.2   |
| $\bar{x}$ 91/2020                                                | 78.6  | 106.9 | 163.0 | 200.0 | 240.7 | 272.0 | 298.7 | 281.3 | 206.4 | 166.1 | 102.3 | 67.0 | 2183.1   |
| $\bar{x}$ 81/2010                                                | 72.2  | 101.7 | 153.2 | 188.1 | 242.2 | 260.9 | 290.8 | 274.0 | 204.3 | 163.1 | 97.0  | 64.5 | 2111.9   |
| $\bar{x}$ 71/2000                                                | 73.7  | 99.8  | 152.8 | 179.1 | 231.2 | 252.1 | 281.4 | 266.9 | 202.6 | 160.9 | 87.7  | 71.1 | 2059.3   |
| $\bar{x}$ 61/1990                                                | 71.4  | 88.0  | 142.8 | 177.5 | 226.0 | 245.1 | 284.3 | 265.9 | 203.2 | 168.3 | 89.1  | 63.0 | 2024.7   |
| Sums and average number of days with precipitation $\geq 0.1$ mm |       |       |       |       |       |       |       |       |       |       |       |      |          |
| 2022                                                             | 9     | 11    | 6     | 15    | 6     | 6     | 4     | 10    | 15    | 5     | 13    | 15   | 115      |
| $\bar{x}$ 91/2020                                                | 13.5  | 12.3  | 11.3  | 12.4  | 13.5  | 12.2  | 10.0  | 8.4   | 9.5   | 10.5  | 10.8  | 13.8 | 138.3    |
| $\bar{x}$ 81/2010                                                | 13.1  | 11.8  | 11.2  | 12.9  | 13.2  | 13.1  | 9.7   | 8.9   | 9.5   | 10.1  | 11.5  | 14.2 | 139.3    |
| $\bar{x}$ 71/2000                                                | 12.5  | 11.3  | 11.2  | 13.2  | 13.8  | 13.5  | 10.1  | 9.3   | 9.6   | 9.7   | 12.0  | 12.9 | 139.2    |
| $\bar{x}$ 61/1990                                                | 13.3  | 12.2  | 11.8  | 12.7  | 13.5  | 13.8  | 9.9   | 8.9   | 9.0   | 8.2   | 12.1  | 13.7 | 139.1    |
| Sums and average number of days with precipitation $\geq 1.0$ mm |       |       |       |       |       |       |       |       |       |       |       |      |          |
| 2022                                                             | 8     | 7     | 3     | 12    | 5     | 4     | 2     | 8     | 10    | 2     | 10    | 10   | 81       |
| $\bar{x}$ 91/2020                                                | 8.0   | 7.0   | 7.4   | 8.0   | 9.4   | 9.4   | 6.6   | 6.3   | 6.8   | 6.8   | 7.0   | 8.2  | 91.0     |
| $\bar{x}$ 81/2010                                                | 7.7   | 6.5   | 7.4   | 8.7   | 9.0   | 9.7   | 6.5   | 6.5   | 6.6   | 6.6   | 7.4   | 8.9  | 91.4     |
| $\bar{x}$ 71/2000                                                | 7.5   | 6.4   | 7.3   | 9.0   | 9.5   | 9.5   | 6.8   | 6.8   | 6.7   | 6.6   | 7.9   | 8.1  | 92.3     |
| $\bar{x}$ 61/1990                                                | 8.1   | 7.4   | 7.9   | 9.1   | 9.9   | 9.8   | 7.2   | 6.4   | 6.3   | 5.7   | 8.6   | 9.0  | 95.3     |

**Table S3.** Climate variables for 2022, referential period 1991-2020 and previous time series: 1981-2010, 1971-2000 and 1961-1990 for the station Surčin.

| Mean air temperature (°C)         |      |      |      |      |      |      |      |      |      |      |      |      |           |
|-----------------------------------|------|------|------|------|------|------|------|------|------|------|------|------|-----------|
| Months<br>Period                  | 1    | 2    | 3    | 4    | 5    | 6    | 7    | 8    | 9    | 10   | 11   | 12   | $\bar{x}$ |
| $\bar{x}$ 2022                    | 1.8  | 6.2  | 6.1  | 11.8 | 19.6 | 24.0 | 25.0 | 24.3 | 17.4 | 14.6 | 8.7  | 6.4  | 13.8      |
| $\bar{x}$ 91/2020                 | 1.0  | 3.0  | 7.5  | 12.9 | 17.6 | 21.4 | 23.2 | 23.2 | 18.0 | 12.8 | 7.4  | 2.2  | 12.5      |
| $\bar{x}$ 81/2010                 | 0.5  | 2.2  | 6.9  | 12.2 | 17.5 | 20.5 | 22.5 | 22.2 | 17.6 | 12.5 | 6.4  | 1.9  | 11.9      |
| $\bar{x}$ 71/2000                 | 0.4  | 2.3  | 6.7  | 11.6 | 16.8 | 19.9 | 21.6 | 21.5 | 17.3 | 11.8 | 5.8  | 1.9  | 11.5      |
| $\bar{x}$ 61/1990                 | -0.7 | 2.0  | 6.5  | 11.5 | 16.7 | 19.6 | 21.4 | 21.0 | 17.4 | 11.9 | 6.2  | 1.6  | 11.3      |
| Mean maximum air temperature (°C) |      |      |      |      |      |      |      |      |      |      |      |      |           |
| $\bar{x}$ 2022                    | 5.2  | 11.3 | 11.7 | 17.2 | 25.4 | 29.7 | 31.3 | 30.5 | 22.9 | 20.7 | 12.5 | 10.5 | 19.1      |
| $\bar{x}$ 91/2020                 | 1.0  | 3.0  | 7.5  | 12.9 | 17.6 | 21.4 | 23.2 | 23.2 | 18.0 | 12.8 | 7.4  | 2.2  | 12.5      |
| $\bar{x}$ 81/2010                 | 0.5  | 2.2  | 6.9  | 12.2 | 17.5 | 20.5 | 22.5 | 22.2 | 17.6 | 12.5 | 6.4  | 1.9  | 11.9      |
| $\bar{x}$ 71/2000                 | 0.4  | 2.3  | 6.7  | 11.6 | 16.8 | 19.9 | 21.6 | 21.5 | 17.3 | 11.8 | 5.8  | 1.9  | 11.5      |
| $\bar{x}$ 61/1990                 | -0.7 | 2.0  | 6.5  | 11.5 | 16.7 | 19.6 | 21.4 | 21.0 | 17.4 | 11.9 | 6.2  | 1.6  | 11.3      |
| Mean minimum air temperature (°C) |      |      |      |      |      |      |      |      |      |      |      |      |           |
| $\bar{x}$ 2022                    | -1.4 | 1.7  | 0.5  | 5.9  | 12.8 | 17.3 | 17.7 | 18.5 | 13.0 | 9.4  | 5.5  | 2.9  | 8.7       |
| $\bar{x}$ 91/2020                 | 1.0  | 3.0  | 7.5  | 12.9 | 17.6 | 21.4 | 23.2 | 23.2 | 18.0 | 12.8 | 7.4  | 2.2  | 12.5      |
| $\bar{x}$ 81/2010                 | 0.5  | 2.2  | 6.9  | 12.2 | 17.5 | 20.5 | 22.5 | 22.2 | 17.6 | 12.5 | 6.4  | 1.9  | 11.9      |
| $\bar{x}$ 71/2000                 | 0.4  | 2.3  | 6.7  | 11.6 | 16.8 | 19.9 | 21.6 | 21.5 | 17.3 | 11.8 | 5.8  | 1.9  | 11.5      |
| $\bar{x}$ 61/1990                 | -0.7 | 2.0  | 6.5  | 11.5 | 16.7 | 19.6 | 21.4 | 21.0 | 17.4 | 11.9 | 6.2  | 1.6  | 11.3      |
| Mean relative humidity (%)        |      |      |      |      |      |      |      |      |      |      |      |      |           |
| $\bar{x}$ 2022                    | 77.8 | 68.3 | 55.0 | 64.0 | 54.2 | 57.8 | 50.5 | 63.4 | 76.7 | 75.0 | 89.0 | 80.7 | 67.7      |
| $\bar{x}$ 91/2020                 | 85.0 | 78.0 | 68.8 | 64.9 | 66.2 | 66.4 | 63.1 | 62.5 | 68.8 | 74.6 | 79.9 | 85.3 | 72.0      |
| $\bar{x}$ 81/2010                 | 85.7 | 79.1 | 70.3 | 67.0 | 65.9 | 68.1 | 65.0 | 64.8 | 70.6 | 74.9 | 81.4 | 85.8 | 73.2      |
| $\bar{x}$ 71/2000                 | 85.0 | 79.2 | 70.0 | 67.7 | 67.5 | 68.6 | 65.7 | 66.1 | 71.4 | 75.0 | 82.7 | 85.5 | 73.7      |
| $\bar{x}$ 61/1990                 | 84.7 | 80.1 | 71.2 | 67.3 | 67.5 | 69.1 | 65.8 | 66.7 | 70.7 | 73.4 | 81.6 | 85.8 | 73.7      |



|                                       |       |       |       |       |       |       |       |       |
|---------------------------------------|-------|-------|-------|-------|-------|-------|-------|-------|
| $\bar{x}$ 2022                        | 13.2  | 25.2  | 14.2  | 4.4   | 12.5  | 24.4  | 13.6  | 3.9   |
| $\bar{x}$ 91/2020                     | 13.4  | 23.2  | 13.3  | 2.9   | 12.7  | 22.6  | 12.7  | 2.0   |
| $\bar{x}$ 81/2010                     | 12.9  | 22.2  | 12.7  | 2.4   | 12.2  | 21.7  | 12.1  | 1.5   |
| $\bar{x}$ 71/2000                     | 12.4  | 21.5  | 12.1  | 2.4   | 11.7  | 21.0  | 11.6  | 1.5   |
| $\bar{x}$ 61/1990                     | 12.2  | 21.0  | 12.4  | 1.9   | 11.6  | 20.7  | 11.8  | 0.9   |
| Mean minimum air temperature (°C)     |       |       |       |       |       |       |       |       |
| $\bar{x}$ 2022                        | 18.7  | 30.9  | 19.4  | 8.2   | 18.1  | 30.5  | 18.7  | 7.6   |
| $\bar{x}$ 91/2020                     | 18.5  | 28.7  | 18.4  | 6.3   | 18.2  | 28.4  | 18.2  | 5.8   |
| $\bar{x}$ 81/2010                     | 18.0  | 27.8  | 17.8  | 5.8   | 17.7  | 27.6  | 17.6  | 5.2   |
| $\bar{x}$ 71/2000                     | 17.5  | 27.0  | 17.2  | 5.7   | 17.2  | 27.0  | 17.0  | 5.2   |
| $\bar{x}$ 61/1990                     | 17.3  | 26.6  | 17.6  | 5.1   | 17.0  | 26.5  | 17.3  | 4.5   |
| Mean maximum air temperature (°C)     |       |       |       |       |       |       |       |       |
| $\bar{x}$ 2022                        | 7.8   | 19.4  | 10.7  | 1.6   | 6.4   | 17.8  | 9.3   | 0.4   |
| $\bar{x}$ 91/2020                     | 8.7   | 17.9  | 9.5   | 0.1   | 7.2   | 16.4  | 8.0   | -1.4  |
| $\bar{x}$ 81/2010                     | 8.3   | 17.0  | 8.9   | -0.3  | 6.8   | 15.6  | 7.4   | -1.9  |
| $\bar{x}$ 71/2000                     | 7.9   | 16.3  | 8.4   | -0.4  | 6.4   | 14.9  | 7.0   | -1.9  |
| $\bar{x}$ 61/1990                     | 7.7   | 15.8  | 8.4   | -0.8  | 6.3   | 14.6  | 7.0   | -2.5  |
| Mean relative humidity (%)            |       |       |       |       |       |       |       |       |
| 2022.                                 | 56.4  | 56.2  | 77.3  | 75.7  | 57.8  | 57.2  | 80.2  | 76.6  |
| $\bar{x}$ 91/2020                     | 62.1  | 61.0  | 71.3  | 76.8  | 66.6  | 64.0  | 74.4  | 82.8  |
| $\bar{x}$ 81/2010                     | 61.7  | 61.9  | 71.3  | 76.0  | 67.8  | 66.0  | 75.6  | 83.6  |
| $\bar{x}$ 71/2000                     | 62.5  | 63.3  | 72.3  | 76.0  | 68.4  | 66.8  | 76.4  | 83.2  |
| $\bar{x}$ 61/1990                     | 63.4  | 64.2  | 71.6  | 77.2  | 68.8  | 67.2  | 75.2  | 83.5  |
| Sums and mean precipitation sums (mm) |       |       |       |       |       |       |       |       |
| $\bar{x}$ 2022                        | 122.8 | 196.9 | 176.0 | 225.7 | 114.7 | 179.5 | 240.3 | 170.4 |
| $\bar{x}$ 91/2020                     | 172.5 | 217.2 | 162.9 | 148.0 | 157.2 | 192.3 | 152.2 | 126.0 |
| $\bar{x}$ 81/2010                     | 163.5 | 222.6 | 160.7 | 144.9 | 152.3 | 216.6 | 155.3 | 122.9 |
| $\bar{x}$ 71/2000                     | 172.9 | 221.4 | 159.6 | 133.6 | 160.3 | 217.1 | 154.5 | 112.6 |
| $\bar{x}$ 61/1990                     | 179.0 | 208.1 | 146.1 | 150.9 | 160.8 | 219.9 | 139.9 | 121.8 |

| Sums and mean of sunshine duration (h)                           |       |       |       |       |       |       |       |       |
|------------------------------------------------------------------|-------|-------|-------|-------|-------|-------|-------|-------|
| $\bar{x}$ 2022                                                   | 721.4 | 920.6 | 451.8 | 307.0 | -     | -     | -     | -     |
| $\bar{x}$ 91/2020                                                | 606.9 | 852.1 | 475.2 | 252.5 | 565.1 | 818.3 | 446.1 | 206.8 |
| $\bar{x}$ 81/2010                                                | 583.6 | 825.7 | 464.3 | 238.4 | 548.0 | 779.6 | 436.1 | 192.8 |
| $\bar{x}$ 71/2000                                                | 563.1 | 800.5 | 451.2 | 243.2 | 522.6 | 741.9 | 421.9 | 194.4 |
| $\bar{x}$ 61/1990                                                | 546.4 | 795.3 | 460.6 | 222.6 | -     | -     | -     | -     |
| Sums and average number of days with precipitation $\geq 0.1$ mm |       |       |       |       |       |       |       |       |
| 2022                                                             | 27    | 20    | 33    | 38    | 30    | 25    | 34    | 39    |
| $\bar{x}$ 91/2020                                                | 37.2  | 30.7  | 30.8  | 39.9  | 35.1  | 29.2  | 29.5  | 36.4  |
| $\bar{x}$ 81/2010                                                | 37.3  | 31.7  | 31.1  | 39.0  | 34.5  | 30.6  | 29.1  | 34.9  |
| $\bar{x}$ 71/2000                                                | 38.2  | 32.9  | 31.3  | 36.9  | 34.9  | 31.8  | 29.3  | 32.7  |
| $\bar{x}$ 61/1990                                                | 38.0  | 32.6  | 29.3  | 39.1  | 35.6  | 31.7  | 28.3  | 35.3  |
| Sums and average number of days with precipitation $\geq 1.0$ mm |       |       |       |       |       |       |       |       |
| 2022                                                             | 20    | 14    | 22    | 30    | 18    | 15    | 19    | 26    |
| $\bar{x}$ 91/2020                                                | 24.8  | 22.3  | 20.6  | 23.4  | 23.3  | 21.6  | 20.4  | 22.8  |
| $\bar{x}$ 81/2010                                                | 25.0  | 22.7  | 20.5  | 23.2  | 22.9  | 22.4  | 20.5  | 22.4  |
| $\bar{x}$ 71/2000                                                | 25.8  | 23.2  | 21.3  | 21.9  | 24.1  | 23.1  | 21.2  | 20.4  |
| $\bar{x}$ 61/1990                                                | 26.9  | 23.4  | 20.6  | 24.4  | 25.1  | 23.5  | 19.8  | 22.1  |

**Table S5.** Statistical summary of mean minimum, maximum, and mean temperature sums (°C), for the beginning of flowering (BF), full flowering (FF), and the end of flowering (EF) and their standard deviations for 13 woody taxa based on data from station Belgrade and Surčin for the period 2007-2022.

| Taxa                                        | Minimum<br>(°C) | Maximum<br>(°C) | Mean<br>(°C) | Std. deviation |
|---------------------------------------------|-----------------|-----------------|--------------|----------------|
| <b>Belgrade</b>                             |                 |                 |              |                |
| <i>Jasminum nudiflorum</i> Lindl. (BF)      | 21.832          | 75.281          | 40.521       | 15.779         |
| <i>Jasminum nudiflorum</i> Lindl. (FF)      | 22.829          | 155.669         | 72.017       | 33.637         |
| <i>Jasminum nudiflorum</i> Lindl. (EF)      | 83.787          | 260.529         | 173.994      | 60.625         |
| <i>Syringa vulgaris</i> L. (BF)             | 220.360         | 358.460         | 282.982      | 41.627         |
| <i>Syringa vulgaris</i> L. (FF)             | 260.571         | 392.960         | 316.701      | 39.783         |
| <i>Syringa vulgaris</i> L. (EF)             | 360.635         | 764.198         | 566.423      | 90.969         |
| <i>Prunus laurocerasus</i> 'Zabeliana' (BF) | 232.710         | 383.498         | 316.280      | 43.258         |
| <i>Prunus laurocerasus</i> 'Zabeliana' (FF) | 279.221         | 455.160         | 364.195      | 47.076         |
| <i>Prunus laurocerasus</i> 'Zabeliana' (EF) | 436.342         | 647.679         | 526.548      | 64.099         |
| <i>Philadelphus coronarius</i> L. (BF)      | 417.935         | 653.259         | 564.183      | 74.258         |



|                                                 |          |          |          |         |
|-------------------------------------------------|----------|----------|----------|---------|
| <i>Philadelphus coronarius</i> L. (FF)          | 442.385  | 705.179  | 607.693  | 67.632  |
| <i>Philadelphus coronarius</i> L. (EF)          | 893.585  | 1185.148 | 1055.370 | 83.839  |
| <i>Forsythia</i> × <i>intermedia</i> Zabel (BF) | 79.350   | 193.718  | 122.607  | 31.659  |
| <i>Forsythia</i> × <i>intermedia</i> Zabel (FF) | 106.942  | 217.375  | 150.640  | 27.923  |
| <i>Forsythia</i> × <i>intermedia</i> Zabel (EF) | 260.571  | 438.750  | 342.840  | 46.465  |
| <i>Cornus sanguinea</i> L. (BF)                 | 413.259  | 617.159  | 536.084  | 60.551  |
| <i>Cornus sanguinea</i> L. (FF)                 | 460.509  | 653.259  | 585.499  | 54.932  |
| <i>Cornus sanguinea</i> L. (EF)                 | 726.509  | 956.398  | 814.298  | 62.588  |
| <i>Cornus alba</i> L. (BF)                      | 410.664  | 590.421  | 480.700  | 63.836  |
| <i>Cornus alba</i> L. (FF)                      | 436.342  | 640.298  | 531.459  | 65.054  |
| <i>Cornus alba</i> L. (EF)                      | 665.792  | 956.398  | 781.049  | 80.311  |
| <i>Cornus alba</i> 'Sibirica' (BF)              | 381.304  | 582.321  | 461.367  | 65.892  |
| <i>Cornus alba</i> 'Sibirica' (FF)              | 422.692  | 618.771  | 511.203  | 68.933  |
| <i>Cornus alba</i> 'Sibirica' (EF)              | 643.892  | 928.098  | 759.314  | 76.335  |
| <b>Surčin</b>                                   |          |          |          |         |
| <i>Ficus carica</i> L. (BF)                     | 829.248  | 1087.282 | 924.185  | 72.139  |
| <i>Ficus carica</i> L. (FF)                     | 1235.582 | 1882.335 | 1381.822 | 158.726 |
| <i>Ficus carica</i> L. (EF)                     | 1748.866 | 2206.935 | 1948.072 | 115.630 |
| <i>Lonicera periclymenum</i> 'Serotina' (BF)    | 401.610  | 586.290  | 493.800  | 50.924  |
| <i>Lonicera periclymenum</i> 'Serotina' (FF)    | 920.544  | 1417.332 | 1138.360 | 119.610 |
| <i>Lonicera periclymenum</i> 'Serotina' (EF)    | 1528.360 | 1862.074 | 1704.028 | 84.599  |
| <i>Rosa rugosa</i> Thunb. (BF)                  | 820.584  | 1049.182 | 948.144  | 68.050  |
| <i>Rosa rugosa</i> Thunb. (FF)                  | 1590.166 | 1883.674 | 1707.744 | 96.311  |
| <i>Rosa rugosa</i> Thunb. (EF)                  | 2273.306 | 2596.482 | 2426.191 | 93.951  |
| <i>Yucca gloriosa</i> L. (BF)                   | 930.834  | 1242.756 | 1054.575 | 85.969  |
| <i>Yucca gloriosa</i> L. (FF)                   | 1593.226 | 2048.645 | 1748.719 | 109.222 |
| <i>Yucca gloriosa</i> L. (EF)                   | 2469.776 | 2823.785 | 2675.247 | 115.098 |
| <i>Amorpha fruticosa</i> L. (BF)                | 483.124  | 741.490  | 607.505  | 69.054  |
| <i>Amorpha fruticosa</i> L. (FF)                | 511.874  | 780.590  | 660.458  | 71.145  |
| <i>Amorpha fruticosa</i> L. (EF)                | 829.248  | 964.640  | 896.172  | 45.565  |

**Table S6.** Results of Mann-Kendall (Kendall's tau), p-value and Sen's slope test for the mean values of temperature sums GDD (°C) and day of the year DOY in the period 2007-2022 for the beginning of flowering (BF), full flowering (FF), the end of flowering (EF), days from the beginning of the flowering to full flowering (BF-FF) and full flowering to the end of flowering (FF-EF) for 13 woody taxa.

| Taxa and phenophase                    | GDD           |         |             | Phenophase | DOY           |         |             |
|----------------------------------------|---------------|---------|-------------|------------|---------------|---------|-------------|
| Test                                   | Kendall's tau | p-value | Sen's slope |            | Kendall's tau | p-value | Sen's slope |
| Belgrade                               |               |         |             |            |               |         |             |
| <i>Jasminum nudiflorum</i> Lindl. (BF) | 0.033         | 0.893   | 0.175       | BF         | -0.185        | 0.343   | -0.852      |
| <i>Jasminum nudiflorum</i> Lindl. (FF) | 0.250         | 0.192   | 2.880       | BF-FF      | 0.247         | 0.205   | 0.500       |

|                                                    |        |               |        |       |        |               |        |
|----------------------------------------------------|--------|---------------|--------|-------|--------|---------------|--------|
| <i>Jasminum nudiflorum</i> Lindl.<br>(EF)          | -0.200 | 0.300         | -2.901 | FF-EF | -0.168 | 0.391         | -0.450 |
| <i>Syringa vulgaris</i> L. (BF)                    | 0.167  | 0.392         | 2.579  | BF    | 0.151  | 0.443         | 0.367  |
| <i>Syringa vulgaris</i> L. (FF)                    | 0.000  | 1.000         | 0.198  | BF-FF | -0.688 | <b>0.001*</b> | -0.250 |
| <i>Syringa vulgaris</i> L. (EF)                    | -0.200 | 0.300         | -7.120 | FF-EF | -0.356 | 0.064         | -0.962 |
| <i>Prunus laurocerasus</i> 'Zabeliana'<br>(BF)     | 0.017  | 0.964         | 0.227  | BF    | 0.101  | 0.620         | 0.125  |
| <i>Prunus laurocerasus</i> 'Zabeliana'<br>(FF)     | -0.050 | 0.822         | -1.707 | BF-FF | -0.532 | <b>0.007*</b> | -0.333 |
| <i>Prunus laurocerasus</i> 'Zabeliana'<br>(EF)     | -0.200 | 0.300         | -4.093 | FF-EF | 0.256  | 0.189         | 0.375  |
| <i>Philadelphus coronarius</i> L. (BF)             | 0.217  | 0.260         | 6.620  | BF    | 0.427  | <b>0.026*</b> | 0.750  |
| <i>Philadelphus coronarius</i> L. (FF)             | 0.083  | 0.685         | 2.603  | BF-FF | -0.435 | <b>0.035*</b> | -0.111 |
| <i>Philadelphus coronarius</i> L. (EF)             | 0.317  | 0.096         | 9.609  | FF-EF | 0.085  | 0.684         | 0.155  |
| <i>Forsythia</i> × <i>intermedia</i> Zabel<br>(BF) | 0.033  | 0.893         | 0.256  | BF    | -0.218 | 0.259         | -0.764 |
| <i>Forsythia</i> × <i>intermedia</i> Zabel<br>(FF) | -0.250 | 0.192         | -2.053 | BF-FF | -0.418 | <b>0.032*</b> | -0.500 |
| <i>Forsythia</i> × <i>intermedia</i> Zabel<br>(EF) | -0.167 | 0.392         | -3.231 | FF-EF | 0.415  | <b>0.034*</b> | 0.414  |
| <i>Cornus sanguinea</i> L. (BF)                    | 0.067  | 0.753         | 1.325  | BF    | 0.228  | 0.240         | 0.293  |
| <i>Cornus sanguinea</i> L. (FF)                    | -0.017 | 0.964         | -0.270 | BF-FF | -0.274 | 0.178         | -0.113 |
| <i>Cornus sanguinea</i> L. (EF)                    | 0.200  | 0.300         | 4.274  | FF-EF | -0.043 | 0.856         | 0.000  |
| <i>Cornus alba</i> L. (BF)                         | 0.150  | 0.444         | 2.588  | BF    | 0.252  | 0.191         | 0.613  |
| <i>Cornus alba</i> L. (FF)                         | -0.017 | 0.964         | -0.247 | BF-FF | -0.609 | <b>0.002*</b> | -0.240 |
| <i>Cornus alba</i> L. (EF)                         | -0.067 | 0.753         | -2.511 | FF-EF | -0.366 | 0.061         | -0.382 |
| <i>Cornus alba</i> 'Sibirica' (BF)                 | 0.133  | 0.499         | 3.205  | BF    | 0.264  | 0.174         | 0.567  |
| <i>Cornus alba</i> 'Sibirica' (FF)                 | 0.017  | 0.964         | 0.493  | BF-FF | -0.500 | <b>0.013*</b> | -0.191 |
| <i>Cornus alba</i> 'Sibirica' (EF)                 | -0.150 | 0.444         | -3.314 | FF-EF | -0.366 | 0.061         | -0.429 |
| <b>Surčin</b>                                      |        |               |        |       |        |               |        |
| <i>Ficus carica</i> L. (BF)                        | -0.100 | 0.620         | -2.739 | BF    | 0.182  | 0.363         | 0.174  |
| <i>Ficus carica</i> L. (FF)                        | 0.050  | 0.822         | 1.924  | BF-FF | -0.196 | 0.319         | -0.303 |
| <i>Ficus carica</i> L. (EF)                        | 0.033  | 0.893         | 2.038  | FF-EF | -0.088 | 0.680         | 0.000  |
| <i>Lonicera periclymenum</i><br>'Serotina' (BF)    | 0.200  | 0.300         | 2.944  | BF    | 0.427  | <b>0.026*</b> | 0.500  |
| <i>Lonicera periclymenum</i><br>'Serotina' (FF)    | 0.183  | 0.344         | 4.418  | BF-FF | 0.017  | 0.964         | 0.000  |
| <i>Lonicera periclymenum</i><br>'Serotina' (EF)    | 0.167  | 0.392         | 5.033  | FF-EF | -0.180 | 0.364         | -0.250 |
| <i>Rosa rugosa</i> Thunb. (BF)                     | -0.017 | 0.964         | -0.907 | BF    | 0.141  | 0.493         | 0.127  |
| <i>Rosa rugosa</i> Thunb. (FF)                     | 0.150  | 0.444         | 6.310  | BF-FF | 0.249  | 0.204         | 0.279  |
| <i>Rosa rugosa</i> Thunb. (EF)                     | 0.400  | <b>0.034*</b> | 13.327 | FF-EF | 0.114  | 0.583         | 0.155  |
| <i>Yucca gloriosa</i> L. (BF)                      | -0.317 | 0.096         | -8.386 | BF    | -0.237 | 0.222         | -0.400 |
| <i>Yucca gloriosa</i> L. (FF)                      | 0.083  | 0.685         | 1.377  | BF-FF | 0.325  | 0.094         | 0.500  |

|                                  |        |       |        |       |        |       |        |
|----------------------------------|--------|-------|--------|-------|--------|-------|--------|
| <i>Yucca gloriosa</i> L. (EF)    | 0.217  | 0.260 | 9.529  | FF-EF | 0.205  | 0.297 | 0.652  |
| <i>Amorpha fruticosa</i> L. (BF) | -0.167 | 0.392 | -4.071 | BF    | -0.110 | 0.588 | -0.333 |
| <i>Amorpha fruticosa</i> L. (FF) | -0.283 | 0.137 | -5.673 | BF-FF | -0.324 | 0.118 | -0.077 |
| <i>Amorpha fruticosa</i> L. (EF) | -0.283 | 0.137 | -4.887 | FF-EF | 0.186  | 0.342 | 0.318  |

\*Values in bold\* are slopes for statistically significant trends at level  $p < 0.05$ .

**Table S7.** Statistical summary of average minimum, maximum and mean DOY for the beginning of the flowering (BF), the period from the beginning to full flowering (BF-FF) and full flowering to the end of flowering (FF-EF), and their standard deviations for 13 woody taxa for the period 2007-2022.

| Taxa                                            | Minimum | Maximum | Mean    | Std. deviation |
|-------------------------------------------------|---------|---------|---------|----------------|
| <b>Belgrade</b>                                 |         |         |         |                |
| <i>Jasminum nudiflorum</i> Lindl. (BF)          | 5.000   | 76.000  | 30.313  | 21.124         |
| <i>Jasminum nudiflorum</i> Lindl. (BF-FF)       | 2.000   | 45.000  | 13.688  | 12.658         |
| <i>Jasminum nudiflorum</i> Lindl. (FF-EF)       | 2.000   | 52.000  | 26.438  | 15.824         |
| <i>Syringa vulgaris</i> L. (BF)                 | 79.000  | 106.000 | 92.500  | 6.703          |
| <i>Syringa vulgaris</i> L. (BF-FF)              | 2.000   | 6.000   | 3.938   | 1.389          |
| <i>Syringa vulgaris</i> L. (FF-EF)              | 12.000  | 37.000  | 24.313  | 7.012          |
| <i>Prunus laurocerasus</i> 'Zabeliana' (BF)     | 88.000  | 108.000 | 96.813  | 6.263          |
| <i>Prunus laurocerasus</i> 'Zabeliana' (BF-FF)  | 2.000   | 9.000   | 4.875   | 2.604          |
| <i>Prunus laurocerasus</i> 'Zabeliana' (FF-EF)  | 9.000   | 27.000  | 15.875  | 4.911          |
| <i>Philadelphus coronarius</i> L. (BF)          | 106.000 | 135.000 | 120.938 | 7.776          |
| <i>Philadelphus coronarius</i> L. (BF-FF)       | 2.000   | 12.000  | 3.500   | 2.477          |
| <i>Philadelphus coronarius</i> L. (FF-EF)       | 23.000  | 40.000  | 32.313  | 4.438          |
| <i>Forsythia × intermedia</i> Zabel (BF)        | 46.000  | 77.000  | 62.563  | 9.784          |
| <i>Forsythia × intermedia</i> Zabel (BF-FF)     | 2.000   | 14.000  | 6.125   | 4.193          |
| <i>Forsythia × intermedia</i> Zabel (FF-EF)     | 18.000  | 48.000  | 30.750  | 6.319          |
| <i>Cornus sanguinea</i> L. (BF)                 | 110.000 | 131.000 | 118.938 | 6.027          |
| <i>Cornus sanguinea</i> L. (BF-FF)              | 2.000   | 9.000   | 4.000   | 1.862          |
| <i>Cornus sanguinea</i> L. (FF-EF)              | 12.000  | 26.000  | 17.750  | 4.091          |
| <i>Cornus alba</i> L. (BF)                      | 106.000 | 125.000 | 114.313 | 6.030          |
| <i>Cornus alba</i> L. (BF-FF)                   | 2.000   | 6.000   | 4.125   | 1.360          |
| <i>Cornus alba</i> L. (FF-EF)                   | 14.000  | 27.000  | 20.063  | 4.008          |
| <i>Cornus alba</i> 'Sibirica' (BF)              | 104.000 | 123.000 | 112.563 | 6.164          |
| <i>Cornus alba</i> 'Sibirica' (BF-FF)           | 2.000   | 6.000   | 4.188   | 1.328          |
| <i>Cornus alba</i> 'Sibirica' FF-EF             | 13.000  | 27.000  | 19.813  | 4.151          |
| <b>Surčin</b>                                   |         |         |         |                |
| <i>Ficus carica</i> L. (BF)                     | 151.000 | 161.000 | 155.063 | 3.586          |
| <i>Ficus carica</i> L. (BF-FF)                  | 17.000  | 54.000  | 26.563  | 8.033          |
| <i>Ficus carica</i> L. (FF-EF)                  | 16.000  | 37.000  | 30.438  | 4.939          |
| <i>Lonicera periclymenum</i> 'Serotina' (BF)    | 116.000 | 130.000 | 121.500 | 4.397          |
| <i>Lonicera periclymenum</i> 'Serotina' (BF-FF) | 35.000  | 53.000  | 46.375  | 4.978          |
| <i>Lonicera periclymenum</i> 'Serotina' (FF-EF) | 24.000  | 43.000  | 31.375  | 4.588          |

|                                     |         |         |         |       |
|-------------------------------------|---------|---------|---------|-------|
| <i>Rosa rugosa</i> Thunb. (BF)      | 150.000 | 166.000 | 156.750 | 5.183 |
| <i>Rosa rugosa</i> Thunb. (BF-FF)   | 37.000  | 48.000  | 42.688  | 3.049 |
| <i>Rosa rugosa</i> Thunb. (FF-EF)   | 30.000  | 44.000  | 37.688  | 3.772 |
| <i>Yucca gloriosa</i> L. (BF)       | 153.000 | 172.000 | 163.063 | 5.183 |
| <i>Yucca gloriosa</i> L. (BF-FF)    | 30.000  | 52.000  | 38.563  | 5.228 |
| <i>Yucca gloriosa</i> L. (FF-EF)    | 41.000  | 59.000  | 50.813  | 5.833 |
| <i>Amorpha fruticosa</i> L. (BF)    | 121.000 | 143.000 | 132.000 | 6.957 |
| <i>Amorpha fruticosa</i> L. (BF-FF) | 2.000   | 8.000   | 4.000   | 1.366 |
| <i>Amorpha fruticosa</i> L. (FF-EF) | 11.000  | 31.000  | 17.563  | 5.966 |

---
